# Supplementary material for: Uptake of m-xylene and VOC emissions by mineral photocatalytic paints of indoor air building interest
Source: Royal Society of Chemistry journal article supplement (doi:10.1039/d3en00084b), 2023-01-01
Supplement: d3en00084b1.pdf [file d3en00084b1.pdf]

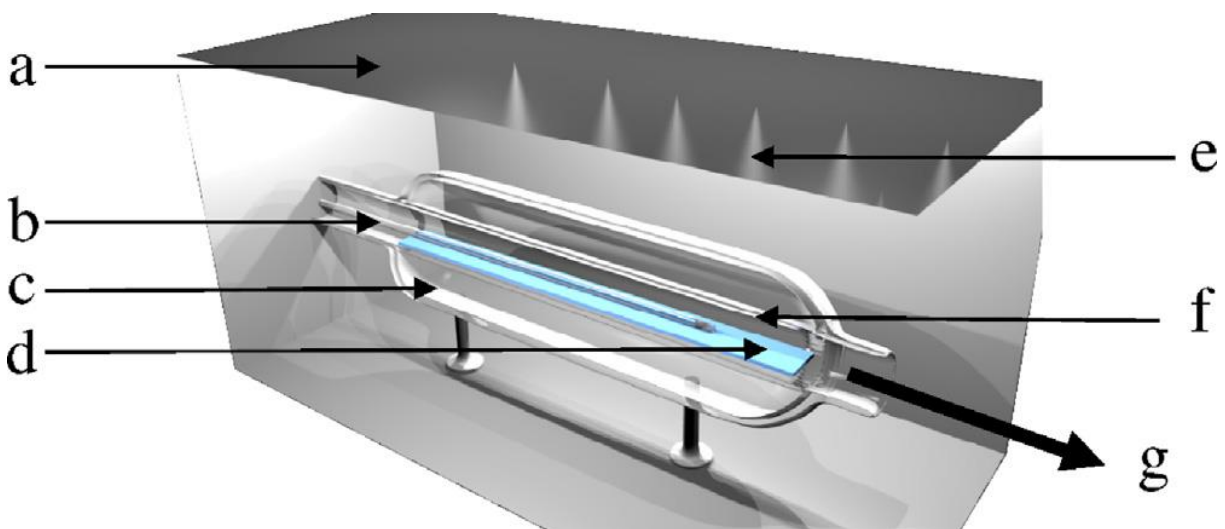

Figure S1. 3D-skatch of (a) stainless steel box, (b) mobile injector, (c) double wall thermostated glass envelope, (d) glass plate covered with the paint, (e) UV lamps (f) the flow tube photo-reactor, and (g) exit of the flow gas to the PTR-MS analyzers.
