# Supplementary material for: Uptake of m-xylene and VOC emissions by mineral photocatalytic paints of indoor air building interest
Source: Royal Society of Chemistry journal article supplement (doi:10.1039/d3en00084b), 2023-01-01
Supplement: d3en00084b2.pdf [file d3en00084b2.pdf]

## Supporting information

### **Uptake of m-xylene and VOCs emission by mineral photocatalytic paints of indoor air building interest**

Julien Morin<sup>a</sup>, Gregory Brochard<sup>b</sup>, Virgine Bergé<sup>b</sup>, Aurélie Rosset<sup>c</sup>, Sébastien Artous<sup>c</sup>, Simon Clavaguera<sup>c</sup>, Rafal S. Strekowski<sup>a</sup>, Henri Wortham<sup>a,‡</sup>

<sup>a</sup> Aix Marseille Univ, CNRS, LCE, UMR 7376, 13331 Marseille, France

<sup>b</sup> ALLIOS, 185 chemin de St Lambert, 13821 La penne sur Huveaune, France

<sup>c</sup> Univ. Grenoble Alpes, CEA, LITEN, DTNM, LMSE, F-38000 Grenoble, France

<sup>‡</sup>Corresponding author: E-mail: [henri.wortham@univ-amu.fr](mailto:henri.wortham@univ-amu.fr) Phone: (+33)(0)413551039

Table S1: Surface emission fluxes (molecules cm<sup>-2</sup> s<sup>-1</sup>) of selected VOCs under UV irradiation for reference paint. The standard deviation (s.d) was calculated using twenty experimental data points.

| Compounds                   | 0 hour                | s.d 0 hour           | 500 hours             | s.d 500 hours        | 1000 hours            | s.d 1000 hours       |
|-----------------------------|-----------------------|----------------------|-----------------------|----------------------|-----------------------|----------------------|
| Formaldehyde                | 9.49·10 <sup>9</sup>  | 9.70·10 <sup>8</sup> | 1.04·10 <sup>10</sup> | 7.76·10 <sup>8</sup> | 1.09·10 <sup>10</sup> | 8.31·10 <sup>8</sup> |
| Methanol                    | 4.26·10 <sup>10</sup> | 1.40·10 <sup>9</sup> | 2.48·10 <sup>10</sup> | 7.44·10 <sup>8</sup> | 2.53·10 <sup>10</sup> | 1.21·10 <sup>9</sup> |
| Acetaldehyde                | 4.92·10 <sup>9</sup>  | 3.02·10 <sup>8</sup> | 6.52·10 <sup>9</sup>  | 2.60·10 <sup>8</sup> | 8.63·10 <sup>9</sup>  | 2.93·10 <sup>8</sup> |
| Formic Acid                 | 1.04·10 <sup>10</sup> | 3.51·10 <sup>8</sup> | 1.50·10 <sup>10</sup> | 5.12·10 <sup>8</sup> | 1.49·10 <sup>10</sup> | 8.14·10 <sup>8</sup> |
| Acrolein                    | 6.82·10 <sup>9</sup>  | 3.97·10 <sup>8</sup> | 6.14·10 <sup>9</sup>  | 4.05·10 <sup>8</sup> | 6.07·10 <sup>9</sup>  | 6.88·10 <sup>8</sup> |
| Acetone +<br>Propanal       | 1.04·10 <sup>9</sup>  | 6.86·10 <sup>7</sup> | 2.34·10 <sup>9</sup>  | 1.11·10 <sup>8</sup> | 2.99·10 <sup>9</sup>  | 1.56·10 <sup>8</sup> |
| Acetic Acid                 | 4.05·10 <sup>10</sup> | 1.64·10 <sup>9</sup> | 4.58·10 <sup>10</sup> | 1.30·10 <sup>9</sup> | 2.42·10 <sup>10</sup> | 6.59·10 <sup>8</sup> |
| MVK                         | 4.14·10 <sup>8</sup>  | 8.23·10 <sup>7</sup> | 5.90·10 <sup>8</sup>  | 7.07·10 <sup>7</sup> | 4.65·10 <sup>8</sup>  | 6.36·10 <sup>7</sup> |
| Acrylic Acid                | 9.41·10 <sup>8</sup>  | 1.07·10 <sup>8</sup> | 1.65·10 <sup>9</sup>  | 1.58·10 <sup>8</sup> | 1.85·10 <sup>9</sup>  | 2.45·10 <sup>8</sup> |
| Propionic Acid              | 7.49·10 <sup>9</sup>  | 5.45·10 <sup>8</sup> | 1.89·10 <sup>9</sup>  | 1.69·10 <sup>8</sup> | 1.82·10 <sup>9</sup>  | 1.39·10 <sup>8</sup> |
| Benzene                     | 5.40·10 <sup>8</sup>  | 1.11·10 <sup>8</sup> | 7.71·10 <sup>8</sup>  | 8.94·10 <sup>7</sup> | 4.65·10 <sup>8</sup>  | 1.15·10 <sup>8</sup> |
| Pentanal + Vinyl<br>Acetate | 1.73·10 <sup>8</sup>  | 3.15·10 <sup>7</sup> | 3.00·10 <sup>8</sup>  | 5.62·10 <sup>7</sup> | 3.12·10 <sup>8</sup>  | 5.97·10 <sup>7</sup> |
| Butanoic Acid               | 7.96·10 <sup>8</sup>  | 1.02·10 <sup>8</sup> | 9.73·10 <sup>8</sup>  | 9.80·10 <sup>7</sup> | 5.02·10 <sup>8</sup>  | 6.11·10 <sup>7</sup> |
| TMB +<br>Ethyltoluene       | 2.77·10 <sup>8</sup>  | 7.77·10 <sup>7</sup> | 4.94·10 <sup>8</sup>  | 9.80·10 <sup>7</sup> | 5.35·10 <sup>8</sup>  | 7.79·10 <sup>7</sup> |
| Benzoic Acid                | 6.43·10 <sup>7</sup>  | 3.54·10 <sup>7</sup> | 9.84·10 <sup>7</sup>  | 3.73·10 <sup>7</sup> | 1.29·10 <sup>8</sup>  | 2.89·10 <sup>7</sup> |
| Octanal                     | 8.53·10 <sup>7</sup>  | 3.17·10 <sup>7</sup> | 1.80·10 <sup>8</sup>  | 3.96·10 <sup>7</sup> | 2.78·10 <sup>8</sup>  | 6.09·10 <sup>7</sup> |

Table S2: Surface emission fluxes (molecules cm<sup>-2</sup> s<sup>-1</sup>) of selected VOCs under UV irradiation for paint nanoTiO<sub>2</sub>. The standard deviation (s.d) was calculated from twenty points of the experiment.

| Compounds                   | 0 hour                | s.d 0 hour           | 500 hours             | s.d 500 hours        | 1000 hours            | s.d 1000 hours       |
|-----------------------------|-----------------------|----------------------|-----------------------|----------------------|-----------------------|----------------------|
| Formaldehyde                | 1.15·10 <sup>10</sup> | 8.05·10 <sup>8</sup> | 5.64·10 <sup>10</sup> | 2.62·10 <sup>9</sup> | 5.29·10 <sup>10</sup> | 2.01·10 <sup>9</sup> |
| Methanol                    | 4.19·10 <sup>10</sup> | 1.65·10 <sup>9</sup> | 4.11·10 <sup>10</sup> | 1.36·10 <sup>9</sup> | 3.51·10 <sup>10</sup> | 1.43·10 <sup>9</sup> |
| Acetaldehyde                | 6.86·10 <sup>9</sup>  | 3.24·10 <sup>8</sup> | 4.52·10 <sup>10</sup> | 1.09·10 <sup>9</sup> | 5.28·10 <sup>10</sup> | 1.30·10 <sup>9</sup> |
| Formic Acid                 | 1.03·10 <sup>10</sup> | 5.27·10 <sup>8</sup> | 2.05·10 <sup>10</sup> | 7.30·10 <sup>8</sup> | 1.95·10 <sup>10</sup> | 7.46·10 <sup>8</sup> |
| Acrolein                    | 6.56·10 <sup>9</sup>  | 5.37·10 <sup>8</sup> | 1.05·10 <sup>10</sup> | 3.88·10 <sup>8</sup> | 8.82·10 <sup>9</sup>  | 4.30·10 <sup>8</sup> |
| Acetone +<br>Propanal       | 1.34·10 <sup>9</sup>  | 1.10·10 <sup>8</sup> | 6.62·10 <sup>9</sup>  | 2.63·10 <sup>8</sup> | 4.57·10 <sup>9</sup>  | 2.15·10 <sup>8</sup> |
| Acetic Acid                 | 5.07·10 <sup>10</sup> | 3.70·10 <sup>9</sup> | 7.54·10 <sup>10</sup> | 1.74·10 <sup>9</sup> | 3.99·10 <sup>10</sup> | 1.06·10 <sup>9</sup> |
| MVK                         | 4.44·10 <sup>8</sup>  | 9.71·10 <sup>7</sup> | 1.47·10 <sup>9</sup>  | 1.19·10 <sup>8</sup> | 1.16·10 <sup>9</sup>  | 1.87·10 <sup>8</sup> |
| Acrylic Acid                | 1.13·10 <sup>9</sup>  | 1.53·10 <sup>8</sup> | 5.81·10 <sup>9</sup>  | 4.10·10 <sup>8</sup> | 3.37·10 <sup>9</sup>  | 2.07·10 <sup>8</sup> |
| Propionic Acid              | 9.07·10 <sup>9</sup>  | 6.09·10 <sup>8</sup> | 9.19·10 <sup>9</sup>  | 5.94·10 <sup>8</sup> | 9.01·10 <sup>9</sup>  | 7.65·10 <sup>8</sup> |
| Benzene                     | 7.40·10 <sup>8</sup>  | 1.33·10 <sup>8</sup> | 1.28·10 <sup>9</sup>  | 1.67·10 <sup>8</sup> | 8.93·10 <sup>8</sup>  | 1.68·10 <sup>8</sup> |
| Pentanal + Vinyl<br>Acetate | 1.87·10 <sup>8</sup>  | 4.50·10 <sup>7</sup> | 1.41·10 <sup>9</sup>  | 1.11·10 <sup>8</sup> | 8.91·10 <sup>8</sup>  | 1.11·10 <sup>8</sup> |
| Butanoic Acid               | 8.42·10 <sup>8</sup>  | 1.22·10 <sup>8</sup> | 1.90·10 <sup>9</sup>  | 1.73·10 <sup>8</sup> | 7.38·10 <sup>8</sup>  | 8.07·10 <sup>7</sup> |
| TMB +<br>Ethyltoluene       | 2.87·10 <sup>8</sup>  | 7.84·10 <sup>7</sup> | 8.09·10 <sup>8</sup>  | 1.48·10 <sup>8</sup> | 6.30·10 <sup>8</sup>  | 1.45·10 <sup>8</sup> |
| Benzoic Acid                | 4.64·10 <sup>7</sup>  | 1.37·10 <sup>7</sup> | 1.73·10 <sup>8</sup>  | 4.79·10 <sup>7</sup> | 1.42·10 <sup>8</sup>  | 4.73·10 <sup>7</sup> |
| Octanal                     | 1.19·10 <sup>8</sup>  | 4.39·10 <sup>7</sup> | 9.44·10 <sup>8</sup>  | 1.63·10 <sup>8</sup> | 1.30·10 <sup>9</sup>  | 1.69·10 <sup>8</sup> |

Table S3: Surface emission fluxes (molecules cm<sup>-2</sup> s<sup>-1</sup>) of selected VOCs under UV irradiation for paint PEG 3350. The standard deviation (s.d) was calculated using twenty experimental data points.

| Compounds                   | 0 hour                | s.d 0 hour           | 500 hours             | s.d 500 hours        | 1000 hours            | s.d 1000 hours       |
|-----------------------------|-----------------------|----------------------|-----------------------|----------------------|-----------------------|----------------------|
| Formaldehyde                | 9.61·10 <sup>9</sup>  | 8.08·10 <sup>8</sup> | 4.46·10 <sup>10</sup> | 1.73·10 <sup>9</sup> | 4.73·10 <sup>10</sup> | 2.44·10 <sup>9</sup> |
| Methanol                    | 4.37·10 <sup>10</sup> | 1.06·10 <sup>9</sup> | 2.99·10 <sup>10</sup> | 1.32·10 <sup>9</sup> | 3.73·10 <sup>10</sup> | 1.37·10 <sup>9</sup> |
| Acetaldehyde                | 5.80·10 <sup>9</sup>  | 3.05·10 <sup>8</sup> | 2.80·10 <sup>10</sup> | 9.20·10 <sup>8</sup> | 4.95·10 <sup>10</sup> | 1.94·10 <sup>9</sup> |
| Formic Acid                 | 1.08·10 <sup>10</sup> | 4.43·10 <sup>8</sup> | 1.41·10 <sup>10</sup> | 5.63·10 <sup>8</sup> | 1.83·10 <sup>10</sup> | 4.99·10 <sup>8</sup> |
| Acrolein                    | 6.49·10 <sup>9</sup>  | 4.04·10 <sup>8</sup> | 6.90·10 <sup>9</sup>  | 4.57·10 <sup>8</sup> | 9.33·10 <sup>9</sup>  | 4.42·10 <sup>8</sup> |
| Acetone +<br>Propanal       | 1.25·10 <sup>9</sup>  | 8.68·10 <sup>7</sup> | 5.78·10 <sup>9</sup>  | 2.45·10 <sup>8</sup> | 3.17·10 <sup>9</sup>  | 1.72·10 <sup>8</sup> |
| Acetic Acid                 | 5.93·10 <sup>10</sup> | 1.66·10 <sup>9</sup> | 5.50·10 <sup>10</sup> | 1.36·10 <sup>9</sup> | 4.45·10 <sup>10</sup> | 1.15·10 <sup>9</sup> |
| MVK                         | 4.95·10 <sup>8</sup>  | 8.04·10 <sup>7</sup> | 1.08·10 <sup>9</sup>  | 1.27·10 <sup>8</sup> | 1.34·10 <sup>9</sup>  | 1.72·10 <sup>8</sup> |
| Acrylic Acid                | 1.14·10 <sup>9</sup>  | 1.71·10 <sup>8</sup> | 3.78·10 <sup>9</sup>  | 2.80·10 <sup>8</sup> | 3.34·10 <sup>9</sup>  | 2.87·10 <sup>8</sup> |
| Propionic Acid              | 8.12·10 <sup>9</sup>  | 3.31·10 <sup>8</sup> | 6.01·10 <sup>9</sup>  | 3.70·10 <sup>8</sup> | 1.80·10 <sup>10</sup> | 1.53·10 <sup>9</sup> |
| Benzene                     | 8.26·10 <sup>8</sup>  | 7.39·10 <sup>7</sup> | 1.02·10 <sup>9</sup>  | 1.29·10 <sup>8</sup> | 1.00·10 <sup>9</sup>  | 1.35·10 <sup>8</sup> |
| Pentanal + Vinyl<br>Acetate | 1.80·10 <sup>8</sup>  | 4.50·10 <sup>7</sup> | 8.16·10 <sup>8</sup>  | 8.54·10 <sup>7</sup> | 7.54·10 <sup>8</sup>  | 7.75·10 <sup>7</sup> |
| Butanoic Acid               | 7.97·10 <sup>8</sup>  | 9.51·10 <sup>7</sup> | 1.26·10 <sup>9</sup>  | 1.29·10 <sup>8</sup> | 7.24·10 <sup>8</sup>  | 1.22·10 <sup>8</sup> |
| TMB +<br>Ethyltoluene       | 2.95·10 <sup>8</sup>  | 7.94·10 <sup>7</sup> | 6.68·10 <sup>8</sup>  | 1.21·10 <sup>8</sup> | 5.60·10 <sup>8</sup>  | 1.18·10 <sup>8</sup> |
| Benzoic Acid                | 3.82·10 <sup>7</sup>  | 1.95·10 <sup>7</sup> | 1.09·10 <sup>8</sup>  | 2.61·10 <sup>8</sup> | 1.24·10 <sup>8</sup>  | 3.86·10 <sup>7</sup> |
| Octanal                     | 1.11·10 <sup>8</sup>  | 4.41·10 <sup>7</sup> | 6.64·10 <sup>8</sup>  | 1.30·10 <sup>8</sup> | 1.23·10 <sup>9</sup>  | 1.72·10 <sup>8</sup> |

Table S4: Surface emission fluxes (molecules cm<sup>-2</sup> s<sup>-1</sup>) of selected VOCs under UV irradiation for paint CNC. The standard deviation (s.d) was calculated using twenty experimental data points.

| Compounds                   | 0 hour                | s.d 0 hour           | 500 hours             | s.d 500 hours        | 1000 hours            | s.d 1000 hours       |
|-----------------------------|-----------------------|----------------------|-----------------------|----------------------|-----------------------|----------------------|
| Formaldehyde                | 8.81·10 <sup>9</sup>  | 8.18·10 <sup>8</sup> | 1.09·10 <sup>10</sup> | 8.23·10 <sup>8</sup> | 1.18·10 <sup>10</sup> | 1.15·10 <sup>9</sup> |
| Methanol                    | 5.93·10 <sup>10</sup> | 2.65·10 <sup>9</sup> | 2.85·10 <sup>10</sup> | 1.27·10 <sup>9</sup> | 2.93·10 <sup>10</sup> | 9.64·10 <sup>8</sup> |
| Acetaldehyde                | 5.57·10 <sup>9</sup>  | 3.10·10 <sup>8</sup> | 6.42·10 <sup>9</sup>  | 3.35·10 <sup>8</sup> | 1.11·10 <sup>10</sup> | 3.25·10 <sup>8</sup> |
| Formic Acid                 | 1.04·10 <sup>10</sup> | 6.40·10 <sup>8</sup> | 1.36·10 <sup>10</sup> | 5.30·10 <sup>8</sup> | 2.09·10 <sup>10</sup> | 7.11·10 <sup>8</sup> |
| Acrolein                    | 6.14·10 <sup>9</sup>  | 3.35·10 <sup>8</sup> | 5.88·10 <sup>9</sup>  | 3.85·10 <sup>8</sup> | 8.86·10 <sup>9</sup>  | 3.56·10 <sup>8</sup> |
| Acetone +<br>Propanal       | 2.50·10 <sup>9</sup>  | 2.53·10 <sup>8</sup> | 1.59·10 <sup>9</sup>  | 9.57·10 <sup>7</sup> | 2.60·10 <sup>9</sup>  | 1.29·10 <sup>8</sup> |
| Acetic Acid                 | 3.89·10 <sup>10</sup> | 2.06·10 <sup>9</sup> | 3.09·10 <sup>10</sup> | 9.45·10 <sup>8</sup> | 4.07·10 <sup>10</sup> | 1.03·10 <sup>9</sup> |
| MVK                         | 3.79·10 <sup>8</sup>  | 7.50·10 <sup>7</sup> | 5.27·10 <sup>8</sup>  | 7.48·10 <sup>7</sup> | 8.80·10 <sup>8</sup>  | 9.72·10 <sup>7</sup> |
| Acrylic Acid                | 1.17·10 <sup>9</sup>  | 1.61·10 <sup>8</sup> | 1.56·10 <sup>9</sup>  | 1.17·10 <sup>8</sup> | 3.56·10 <sup>9</sup>  | 2.11·10 <sup>8</sup> |
| Propionic Acid              | 5.18·10 <sup>9</sup>  | 4.63·10 <sup>8</sup> | 1.20·10 <sup>9</sup>  | 1.79·10 <sup>8</sup> | 2.50·10 <sup>9</sup>  | 2.17·10 <sup>8</sup> |
| Benzene                     | 6.76·10 <sup>8</sup>  | 1.65·10 <sup>8</sup> | 5.07·10 <sup>8</sup>  | 1.21·10 <sup>8</sup> | 8.28·10 <sup>8</sup>  | 1.10·10 <sup>8</sup> |
| Pentanal + Vinyl<br>Acetate | 1.99·10 <sup>8</sup>  | 5.18·10 <sup>7</sup> | 3.12·10 <sup>8</sup>  | 4.59·10 <sup>7</sup> | 1.42·10 <sup>9</sup>  | 1.26·10 <sup>8</sup> |
| Butanoic Acid               | 6.23·10 <sup>8</sup>  | 1.17·10 <sup>8</sup> | 8.15·10 <sup>8</sup>  | 1.32·10 <sup>8</sup> | 1.65·10 <sup>9</sup>  | 1.35·10 <sup>8</sup> |
| TMB +<br>Ethyltoluene       | 3.23·10 <sup>8</sup>  | 1.11·10 <sup>8</sup> | 4.89·10 <sup>8</sup>  | 1.06·10 <sup>8</sup> | 5.50·10 <sup>8</sup>  | 8.74·10 <sup>7</sup> |
| Benzoic Acid                | 4.24·10 <sup>7</sup>  | 2.92·10 <sup>7</sup> | 7.07·10 <sup>7</sup>  | 3.32·10 <sup>7</sup> | 1.75·10 <sup>8</sup>  | 5.12·10 <sup>7</sup> |
| Octanal                     | 9.34·10 <sup>7</sup>  | 3.76·10 <sup>7</sup> | 2.27·10 <sup>8</sup>  | 7.18·10 <sup>7</sup> | 3.30·10 <sup>8</sup>  | 8.61·10 <sup>7</sup> |

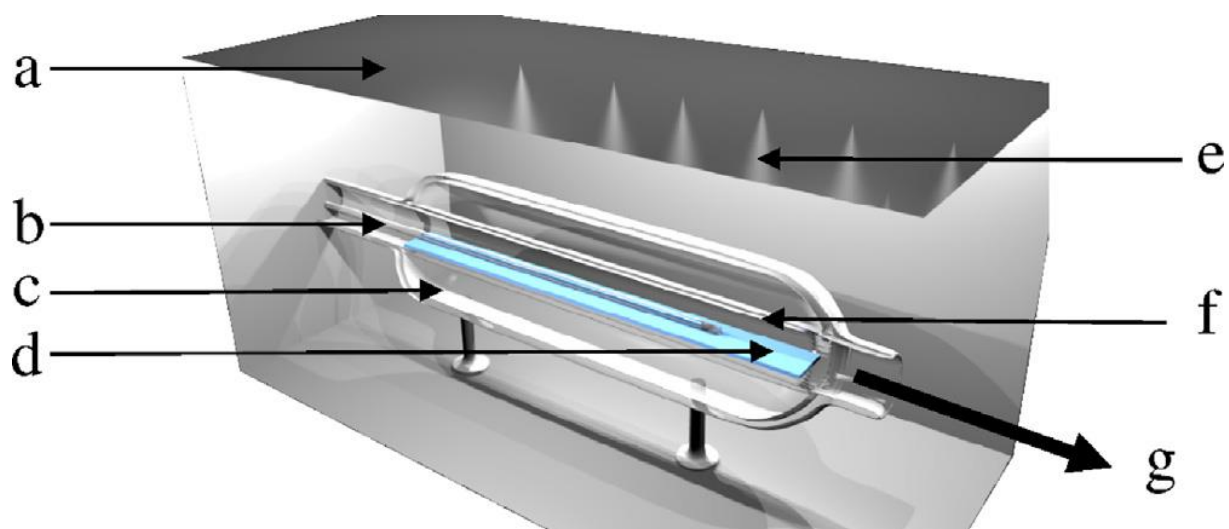

Fig. S1. 3D-skatch of (a) stainless steel box, (b) mobile injector, (c) double wall thermostated glass envelope, (d) glass plate covered with the paint, (e) UV lamps (f) the flow tube photo-reactor, and (g) exit of the flow gas to the PTR-MS analyzers.
